# Supplementary material
Source: PubMed Central journal article supplement (PMC10330235)
Supplement: NIHMS1894456-supplement-2.pdf [file NIHMS1894456-supplement-2.pdf]

## Thiesler et al.

Proinflammatory macrophage activation by the polysialic acid-Siglec-16 axis is linked to increased survival of glioblastoma patients

### Supplementary Tables S1-S14

#### Supplementary Table S1.

Demographic and clinical parameters of GB patient cohorts

|                                                      | MHH cohort<br>n = 70 | UMG cohort<br>n = 100 |
|------------------------------------------------------|----------------------|-----------------------|
| <b>Age at primary resection [years]</b>              |                      |                       |
| Median                                               | 60                   | 65                    |
| Range                                                | 32 - 85              | 25 - 80               |
| <b>Overall survival [months]</b>                     |                      |                       |
| Median                                               | 10                   | 13                    |
| Range                                                | 0 - 76               | 1 - 55                |
| <b>Sex: female/male (ratio)</b>                      | 31 / 39 (1 : 1.26)   | 43 / 57 (1 : 1.33)    |
| <b>Extent of resection: n (%)</b>                    |                      |                       |
| Gross total resection                                | 37 (54%)             | 75 (75%)              |
| Sub-total resection                                  | 25 (36%)             | 24 (24%)              |
| Biopsy                                               | 8 (11%)              | 1 (1%)                |
| <b>IDH1/2 mutation: n (%)</b>                        | not determined       | 3 (3%)                |
| <b>MGMT gene promoter methylation: n (%)</b>         | not determined       | 35 (35%)              |
| <b>Therapeutic intervention after surgery: n (%)</b> |                      |                       |
| Combined radio- and chemotherapy <sup>a</sup>        | 45 (64%)             | 100 (100%)            |
| Radiotherapy                                         | 18 (26%)             | 0 (0%)                |
| No adjuvant therapy                                  | 7 (10%)              | 0 (0%)                |

<sup>a</sup> MHH: temozolomide, UMG: temozolomide, nimustine, or carmustine

**Supplementary Table S2.**

Characteristics of the two cohorts of n = 70 (MHH) and n = 100 (UMG) GB patients stratified for the presence of a functional *SIGLEC16* allele (A) or for the occurrence of polySia on tumor cells (B)

**A. Comparison of *SIGLEC16*-positive and -negative GB patients**

|                                                                       |         | <i>SIGLEC16</i> <sup>P/P</sup> | <i>SIGLEC16</i> <sup>+P</sup> | Statistics                              |                        |
|-----------------------------------------------------------------------|---------|--------------------------------|-------------------------------|-----------------------------------------|------------------------|
| Distribution<br>n (%)                                                 | MHH     | 45 (64%)                       | 25 (36%)                      | <i>P</i> = 0.116<br>(MHH versus<br>UMG) | Fisher's exact<br>test |
|                                                                       | UMG     | 51 (51%)                       | 49 (49%)                      |                                         |                        |
|                                                                       | MHH+UMG | 96 (56%)                       | 74 (44%)                      |                                         |                        |
| Age [years] <sup>a</sup><br>median ± SD<br>(range)                    | MHH     | 58 ± 12 (35-80)                | 61 ± 13 (32-85)               | <i>P</i> = 0.481                        | Mann-Whitney<br>test   |
|                                                                       | UMG     | 66 ± 10 (37-80)                | 64 ± 13 (25-78)               | <i>P</i> = 0.294                        |                        |
| Sex<br>female /male<br>(ratio)                                        | MHH     | 23 / 22 (1 : 0.96)             | 8 / 17 (1 : 2.13)             | <i>P</i> = 0.140                        | Fisher's exact<br>test |
|                                                                       | UMG     | 21 / 30 (1 : 1.43)             | 22 / 27 (1 : 1.23)            | <i>P</i> = 0.840                        |                        |
| Gross total<br>resection<br>n (%) <sup>c</sup>                        | MHH     | 23 (51%)                       | 14 (56 %)                     | <i>P</i> = 0.804                        | Fisher's exact<br>test |
|                                                                       | UMG     | 34 (66%)                       | 41 (84%)                      | <i>P</i> = 0.065                        |                        |
| Chemotherapy <sup>b</sup><br>n (%) <sup>c</sup>                       | MHH     | 28 (62%)                       | 17 (68 %)                     | <i>P</i> = 0.795                        | Fisher's exact<br>test |
|                                                                       | UMG     | 51 (100%)                      | 49 (100%)                     | <i>P</i> > 0.999                        |                        |
| <i>MGMT</i> promotor<br>methylated <sup>d</sup><br>n (%) <sup>c</sup> | UMG     | 16 (31%)                       | 19 (39%)                      | <i>P</i> = 0.530                        | Fisher's exact<br>test |
| Cases with<br>polySia-positive<br>tumor cells<br>n (%) <sup>c</sup>   | MHH     | 38 (84%)                       | 22 (88%)                      | <i>P</i> > 0.999                        | Fisher's exact<br>test |
|                                                                       | UMG     | 39 (77%)                       | 43 (88%)                      | <i>P</i> = 0.194                        |                        |
|                                                                       | MHH+UMG | 76 (79%)                       | 65 (88%)                      | <i>P</i> = 0.154                        |                        |

<sup>a</sup> Age at primary resection

<sup>b</sup> MHH: temozolomide, UMG: temozolomide, nimustine, or carmustine

<sup>c</sup> % of all *SIGLEC16*<sup>P/P</sup> or *SIGLEC16*<sup>+P</sup> (A) and polySia-positive or -negative cases (B), respectively

<sup>d</sup> For MHH cohort not determined

**Supplementary Table S2 (continued).**

**B. Comparison of GB patients with polySia-positive and -negative tumor cells**

|                                                                       |         | <b>polySia-positive<br/>tumor cells</b> | <b>no polySia-positive<br/>tumor cells</b> | <b>Statistics</b>                       |                        |
|-----------------------------------------------------------------------|---------|-----------------------------------------|--------------------------------------------|-----------------------------------------|------------------------|
| Distribution<br>n (%)                                                 | MHH     | 60 (86%)                                | 10 (14%)                                   | <i>P</i> = 0.675<br>(MHH versus<br>UMG) | Fisher's exact<br>test |
|                                                                       | UMG     | 82 (82%)                                | 18 (18%)                                   |                                         |                        |
|                                                                       | MHH+UMG | 142 (84%)                               | 28 (16%)                                   |                                         |                        |
| Age [years] <sup>a</sup><br>median ± SD<br>(range)                    | MHH     | 59.5 ± 13 (32-85)                       | 60 ± 11 (43-78)                            | <i>P</i> = 0.682                        | Mann-Whitney<br>test   |
|                                                                       | UMG     | 65.5 ± 12 (25-80)                       | 64.5 ± 11 (37-79)                          | <i>P</i> = 0.861                        |                        |
| Sex<br>female /male<br>(ratio)                                        | MHH     | 25 / 34 (1 : 1.36)                      | 6 / 5 (1 : 0.83)                           | <i>P</i> = 0.520                        | Fisher's exact<br>test |
|                                                                       | UMG     | 35 / 47 (1 : 1.34)                      | 8 / 10 (1 : 1.25)                          | <i>P</i> > 0.999                        |                        |
| Gross total<br>resection<br>n (%) <sup>c</sup>                        | MHH     | 32 (53%)                                | 5 (50%)                                    | <i>P</i> > 0.999                        | Fisher's exact<br>test |
|                                                                       | UMG     | 62 (75%)                                | 13 (72%)                                   | <i>P</i> = 0.769                        |                        |
| Chemotherapy <sup>b</sup><br>n (%) <sup>c</sup>                       | MHH     | 40 (68%)                                | 5 (46%)                                    | <i>P</i> = 0.183                        | Fisher's exact<br>test |
|                                                                       | UMG     | 82 (100%)                               | 18 (100%)                                  | <i>P</i> > 0.999                        |                        |
| <i>MGMT</i> promotor<br>methylated <sup>d</sup><br>n (%) <sup>c</sup> | UMG     | 28 (34%)                                | 7 (39%)                                    | <i>P</i> = 0.787                        | Fisher's exact<br>test |
| <i>SIGLEC16</i> <sup>+P</sup><br>cases<br>n (%) <sup>c</sup>          | MHH     | 22 (37%)                                | 3 (30%)                                    | <i>P</i> > 0.999                        | Fisher's exact<br>test |
|                                                                       | UMG     | 43 (52%)                                | 6 (33%)                                    | <i>P</i> = 0.194                        |                        |
|                                                                       | MHH+UMG | 65 (46%)                                | 9 (32%)                                    | <i>P</i> = 0.154                        |                        |

<sup>a</sup> Age at primary resection

<sup>b</sup> MHH: temozolomide, UMG: temozolomide, nimustine, or carmustine

<sup>c</sup> % of all *SIGLEC16*<sup>P/P</sup> or *SIGLEC16*<sup>+P</sup> (A) and polySia-positive or -negative cases (B), respectively

<sup>d</sup> For MHH cohort not determined

**Supplementary Table S3.**

Cox proportional hazards regression analysis of covariates for *SIGLEC16* and polySia status in relation to OS (MHH and UMG cohorts combined)

| Variable<br>(see Table 1C)                   | Covariates            | HR <sup>a</sup> (95% CI) | P                            |
|----------------------------------------------|-----------------------|--------------------------|------------------------------|
| <i>SIGLEC16</i>                              | cohort                | 1.15 (0.80 – 1.67)       | P = 0.46                     |
|                                              | Age at resection      | 1.02 (1.01 – 1.03)       | <b>P = 0.005<sup>b</sup></b> |
|                                              | Sex                   | 1.27 (0.92 – 1.74)       | P = 0.14                     |
|                                              | Gross total resection | 0.90 (0.63 – 1.30)       | P = 0.56                     |
|                                              | Chemotherapy          | 0.29 (0.17 – 0.56)       | <b>P &lt; 0.0001</b>         |
| polySia                                      | cohort                | 1.06 (0.74 – 1.55)       | P = 0.75                     |
|                                              | Age at resection      | 1.02 (1.01 – 1.04)       | <b>P = 0.002</b>             |
|                                              | Sex                   | 1.37 (1.00 – 1.87)       | P = 0.050                    |
|                                              | Gross total resection | 0.76 (0.54 – 1.09)       | P = 0.13                     |
|                                              | Chemotherapy          | 0.37 (0.22 – 0.64)       | <b>P = 0.0003</b>            |
| <i>SIGLEC16</i> / polySia<br>double-positive | cohort                | 1.11 (0.78 – 1.62)       | P = 0.57                     |
|                                              | Age at resection      | 1.02 (1.01 – 1.03)       | <b>P = 0.008</b>             |
|                                              | Sex                   | 1.27 (0.92 – 1.74)       | P = 0.15                     |
|                                              | Gross total resection | 0.88 (0.62 – 1.26)       | P = 0.46                     |
|                                              | Chemotherapy          | 0.32 (0.19 – 0.55)       | <b>P &lt; 0.0001</b>         |

<sup>a</sup> Abbreviations: HR, hazard ratio; CI, confidence interval

<sup>b</sup> P-values < 0.05 are shown in bold

**Supplementary Table S4.**

Median age of GB cases stratified for *SIGLEC16* genotype and polySia on tumor cells

| Median age [years] <sup>a</sup> ± SD (range), n |                                     |                                     |                                            |
|-------------------------------------------------|-------------------------------------|-------------------------------------|--------------------------------------------|
|                                                 | <i>SIGLEC16</i> <sup>P/P</sup>      | <i>SIGLEC16</i> <sup>+/P</sup>      | Mann-Whitney test                          |
| MHH                                             | 58.0 ± 12.4 (35-80), 45             | 61.0 ± 13.0 (32-85), 25             | <i>P</i> = 0.48                            |
| UMG                                             | 66.0 ± 10.1 (37-80), 51             | 64.0 ± 12.7 (25-78), 49             | <i>P</i> = 0.29                            |
| MHH+UMG                                         | 62.5 ± 11.6 (35-80), 96             | 64.0 ± 12.7 (25-85), 74             | <i>P</i> = 0.89                            |
|                                                 | Negative for polySia on tumor cells | Positive for polySia on tumor cells |                                            |
| MHH                                             | 60.0 ± 11.0 (43-78), 10             | 59.5 ± 12.9 (32-85), 60             | <i>P</i> = 0.68                            |
| UMG                                             | 64.5 ± 10.9 (37-79), 18             | 65.5 ± 11.7 (25-80), 82             | <i>P</i> = 0.86                            |
| MHH+UMG                                         | 63.5 ± 10.8 (37-79), 28             | 63.0 ± 12.3 (25-85), 142            | <i>P</i> = 0.87                            |
| Median age [years] <sup>a</sup> ± SD (range), n |                                     |                                     |                                            |
|                                                 |                                     | <i>SIGLEC16</i> <sup>P/P</sup>      | <i>SIGLEC16</i> <sup>+/P</sup>             |
| <b>polySia-negative</b>                         | MHH                                 | 56.0 ± 12.0 (43-78), 7              | 70.0 ± 8.1 (57-72), 3                      |
|                                                 | UMG                                 | 66.0 ± 12.4 (37-79), 12             | 63.5 ± 8.0 (54-78), 6                      |
|                                                 | MHH+UMG                             | 63.0 ± 12.1 (37-79), 19             | 64.0 ± 7.6 (54-78), 9                      |
| <b>polySia-positive</b>                         | MHH                                 | 58.5 ± 12.6 (35-80), 38             | 60.5 ± 13.5 (32-85), 22                    |
|                                                 | UMG                                 | 66.0 ± 9.4 (46-80), 39              | 65.0 ± 13.2 (25-78), 43                    |
|                                                 | MHH+UMG                             | 62.0 ± 11.5 (35-80), 77             | 64.0 ± 13.2 (25-85), 65                    |
| <b>Statistics</b>                               |                                     | <b>Kruskal-Wallis test</b>          | <b>Dunn's post test</b>                    |
|                                                 | MHH                                 | <i>P</i> = 0.74                     | <i>P</i> > 0.999 for all group comparisons |
|                                                 | UMG                                 | <i>P</i> = 0.70                     |                                            |
|                                                 | MHH+UMG                             | <i>P</i> = 0.91                     |                                            |

<sup>a</sup> Age at primary resection

**Supplementary Table S5.**

OS analysis of GB cases receiving (A) or not receiving gross total resection (B) stratified for *SIGLEC16* genotype and polySia on tumor cells (MHH and UMG cohorts combined)

**A. Gross total resection (n=112)**

| GB status                                           | n  | median OS [months] | statistics (log-rank test)                                                                                               |
|-----------------------------------------------------|----|--------------------|--------------------------------------------------------------------------------------------------------------------------|
| <i>SIGLEC16</i> <sup>P/P</sup>                      | 57 | 9                  | <i>P</i> = 0.0003                                                                                                        |
| <i>SIGLEC16</i> <sup>+/P</sup>                      | 55 | 15                 |                                                                                                                          |
| polySia-negative                                    | 18 | 8                  | <i>P</i> = 0.031                                                                                                         |
| polySia-positive                                    | 94 | 13                 |                                                                                                                          |
| <i>SIGLEC16</i> <sup>P/P</sup> polySia <sup>-</sup> | 11 | 9                  | <i>P</i> = 0.0009<br>$\left. \begin{array}{l} P = 0.0005^a \\ q = 0.002 \\ P = 0.0009 \\ q = 0.002 \end{array} \right\}$ |
| <i>SIGLEC16</i> <sup>+/P</sup> polySia <sup>-</sup> | 7  | 5                  |                                                                                                                          |
| <i>SIGLEC16</i> <sup>P/P</sup> polySia <sup>+</sup> | 46 | 9                  |                                                                                                                          |
| <i>SIGLEC16</i> <sup>+/P</sup> polySia <sup>+</sup> | 48 | 15.5               |                                                                                                                          |

<sup>a</sup> Differences with *P* < 0.05 and respective FDR adjusted *q* values are shown

**B. Subtotal resection or biopsy (n=58)<sup>a</sup>**

| GB status                                           | n               | median OS [months] | statistics (log-rank test)                                                                                            |
|-----------------------------------------------------|-----------------|--------------------|-----------------------------------------------------------------------------------------------------------------------|
| <i>SIGLEC16</i> <sup>P/P</sup>                      | 38 <sup>a</sup> | 10                 | <i>P</i> = 0.151                                                                                                      |
| <i>SIGLEC16</i> <sup>+/P</sup>                      | 19              | 10                 |                                                                                                                       |
| polySia-negative                                    | 10 <sup>a</sup> | 5.5                | <i>P</i> = 0.060                                                                                                      |
| polySia-positive                                    | 47              | 10                 |                                                                                                                       |
| <i>SIGLEC16</i> <sup>P/P</sup> polySia <sup>-</sup> | 8               | 4                  | <i>P</i> = 0.015<br>$\left. \begin{array}{l} P = 0.004^b \\ q = 0.019 \\ P = 0.017 \\ q = 0.045 \end{array} \right\}$ |
| <i>SIGLEC16</i> <sup>+/P</sup> polySia <sup>-</sup> | 2               | 16.5               |                                                                                                                       |
| <i>SIGLEC16</i> <sup>P/P</sup> polySia <sup>+</sup> | 30 <sup>a</sup> | 11.5               |                                                                                                                       |
| <i>SIGLEC16</i> <sup>+/P</sup> polySia <sup>+</sup> | 17              | 10                 |                                                                                                                       |

<sup>a</sup> One value censored because OS was zero

<sup>b</sup> Differences with *P* < 0.05 and respective FDR adjusted *q* values are shown

**Supplementary Table S6.**

OS analysis of GB cases receiving (A) or not receiving chemotherapy (B) stratified for *SIGLEC16* genotype and polySia on tumor cells (MHH cohort only)

**A. Combined radio- and chemotherapy (n=45)**

| GB status                                           | n  | median OS [months] | statistics (log-rank test) |
|-----------------------------------------------------|----|--------------------|----------------------------|
| <i>SIGLEC16</i> <sup>P/P</sup>                      | 28 | 11                 | P = 0.010                  |
| <i>SIGLEC16</i> <sup>+/P</sup>                      | 17 | 15                 |                            |
| polySia-negative                                    | 4  | 7                  | P = 0.005                  |
| polySia-positive                                    | 41 | 13                 |                            |
| <i>SIGLEC16</i> <sup>P/P</sup> polySia <sup>-</sup> | 3  | 7                  | P = 0.003                  |
| <i>SIGLEC16</i> <sup>+/P</sup> polySia <sup>-</sup> | 1  | 7                  |                            |
| <i>SIGLEC16</i> <sup>P/P</sup> polySia <sup>+</sup> | 25 | 11                 |                            |
| <i>SIGLEC16</i> <sup>+/P</sup> polySia <sup>+</sup> | 16 | 16                 |                            |

$\left. \begin{array}{l} P = 0.0006^a \\ q = 0.002 \\ P = 0.006 \\ q = 0.010 \\ P = 0.012 \\ q = 0.013 \end{array} \right\}$

<sup>a</sup> Differences with  $P < 0.05$  and respective FDR adjusted  $q$  values are shown

**B. Radiotherapy or no adjuvant therapy (n=25)<sup>a</sup>**

| GB status                                           | n               | median OS [months] | statistics (log-rank test) |
|-----------------------------------------------------|-----------------|--------------------|----------------------------|
| <i>SIGLEC16</i> <sup>P/P</sup>                      | 16 <sup>a</sup> | 4                  | P = 0.059                  |
| <i>SIGLEC16</i> <sup>+/P</sup>                      | 8               | 7.5                |                            |
| polySia-negative                                    | 6               | 4.5                | P = 0.63                   |
| polySia-positive                                    | 18 <sup>a</sup> | 4                  |                            |
| <i>SIGLEC16</i> <sup>P/P</sup> polySia <sup>-</sup> | 4               | 4.5                | P = 0.27                   |
| <i>SIGLEC16</i> <sup>+/P</sup> polySia <sup>-</sup> | 2               | 9                  |                            |
| <i>SIGLEC16</i> <sup>P/P</sup> polySia <sup>+</sup> | 12 <sup>a</sup> | 4                  |                            |
| <i>SIGLEC16</i> <sup>+/P</sup> polySia <sup>+</sup> | 6               | 7.5                |                            |

<sup>a</sup> One value censored because OS was zero

**Supplementary Table S7.**

OS analysis of GB cases receiving gross total resection and chemotherapy stratified for *SIGLEC16* genotype and polySia on tumor cells (MHH and UMG cohorts combined, n=101)

| GB status                                           | n  | median OS [months] | statistics (log-rank test)                                                 |
|-----------------------------------------------------|----|--------------------|----------------------------------------------------------------------------|
| <i>SIGLEC16</i> <sup>P/P</sup>                      | 49 | 11                 | P = 0.002                                                                  |
| <i>SIGLEC16</i> <sup>+/P</sup>                      | 52 | 15                 |                                                                            |
| polySia-negative                                    | 15 | 9                  | P = 0.020                                                                  |
| polySia-positive                                    | 86 | 14                 |                                                                            |
| <i>SIGLEC16</i> <sup>P/P</sup> polySia <sup>-</sup> | 10 | 10                 | P = 0.003<br>P = 0.001 <sup>a</sup><br>q = 0.006<br>P = 0.004<br>q = 0.007 |
| <i>SIGLEC16</i> <sup>+/P</sup> polySia <sup>-</sup> | 5  | 5                  |                                                                            |
| <i>SIGLEC16</i> <sup>P/P</sup> polySia <sup>+</sup> | 39 | 12                 |                                                                            |
| <i>SIGLEC16</i> <sup>+/P</sup> polySia <sup>+</sup> | 47 | 16                 |                                                                            |

<sup>a</sup> Differences with *P* < 0.05 and respective FDR adjusted *q* values are shown

**Supplementary Table S8.**

OS analysis of IDH-wildtype GB cases (UMG cohort) stratified for *SIGLEC16* genotype and polySia on tumor cells

| GB status                                           | n  | median OS [months] | statistics (log-rank test)                                                 |
|-----------------------------------------------------|----|--------------------|----------------------------------------------------------------------------|
| <i>SIGLEC16</i> <sup>P/P</sup>                      | 49 | 12                 | P = 0.014                                                                  |
| <i>SIGLEC16</i> <sup>+/P</sup>                      | 48 | 14.5               |                                                                            |
| polySia-negative                                    | 17 | 11                 | P = 0.136                                                                  |
| polySia-positive                                    | 80 | 13                 |                                                                            |
| <i>SIGLEC16</i> <sup>P/P</sup> polySia <sup>-</sup> | 11 | 11                 | P = 0.031<br>P = 0.005 <sup>a</sup><br>q = 0.024<br>P = 0.048<br>q = 0.125 |
| <i>SIGLEC16</i> <sup>+/P</sup> polySia <sup>-</sup> | 6  | 9.5                |                                                                            |
| <i>SIGLEC16</i> <sup>P/P</sup> polySia <sup>+</sup> | 38 | 12                 |                                                                            |
| <i>SIGLEC16</i> <sup>+/P</sup> polySia <sup>+</sup> | 42 | 15                 |                                                                            |

<sup>a</sup> Differences with *P* < 0.05 and respective FDR adjusted *q* values are shown



**Supplementary Table S9.**

OS analysis of UMG cohort stratified for *MGMT* gene promoter methylation and *SIGLEC16* genotype, polySia on tumor cells, CD163 and CD74 status

| GB status                                                  | n  | median OS<br>[months] | statistics<br>(log-rank test)                                             |
|------------------------------------------------------------|----|-----------------------|---------------------------------------------------------------------------|
| <i>MGMT</i> unmethylated<br><i>SIGLEC16</i> <sup>P/P</sup> | 35 | 12                    | $P = 0.033$<br>$P = 0.012^a$<br>$q = 0.024$<br>$P = 0.010$<br>$q = 0.024$ |
| <i>MGMT</i> unmethylated<br><i>SIGLEC16</i> <sup>+/P</sup> | 30 | 13                    |                                                                           |
| <i>MGMT</i> methylated<br><i>SIGLEC16</i> <sup>P/P</sup>   | 16 | 7                     |                                                                           |
| <i>MGMT</i> methylated<br><i>SIGLEC16</i> <sup>+/P</sup>   | 19 | 19                    |                                                                           |
| <hr/>                                                      |    |                       |                                                                           |
| <i>MGMT</i> unmethylated<br>polySia <sup>-</sup>           | 11 | 11                    | $P = 0.366$                                                               |
| <i>MGMT</i> unmethylated<br>polySia <sup>+</sup>           | 54 | 13                    |                                                                           |
| <i>MGMT</i> methylated<br>polySia <sup>-</sup>             | 7  | 9                     |                                                                           |
| <i>MGMT</i> methylated<br>polySia <sup>+</sup>             | 28 | 13.5                  |                                                                           |
| <hr/>                                                      |    |                       |                                                                           |
| <i>MGMT</i> unmethylated<br>CD163 <sup>high</sup>          | 48 | 12.5                  | $P = 0.227$                                                               |
| <i>MGMT</i> unmethylated<br>CD163 <sup>low</sup>           | 17 | 12                    |                                                                           |
| <i>MGMT</i> methylated<br>CD163 <sup>high</sup>            | 22 | 12                    |                                                                           |
| <i>MGMT</i> methylated<br>CD163 <sup>low</sup>             | 13 | 20                    |                                                                           |
| <hr/>                                                      |    |                       |                                                                           |
| <i>MGMT</i> unmethylated<br>CD74 <sup>low</sup>            | 40 | 11                    | $P = 0.242$                                                               |
| <i>MGMT</i> unmethylated<br>CD74 <sup>high</sup>           | 25 | 14                    |                                                                           |
| <i>MGMT</i> methylated<br>CD74 <sup>low</sup>              | 20 | 12.5                  |                                                                           |
| <i>MGMT</i> methylated<br>CD74 <sup>high</sup>             | 15 | 18                    |                                                                           |

<sup>a</sup> Differences with  $P < 0.05$  and respective FDR adjusted  $q$  values are shown

### Supplementary Table S10.

Characteristics of the two cohorts of n = 70 (MHH) and n = 100 (UMG) GB patients stratified for CD74<sup>low</sup> and CD74<sup>high</sup>

|                                                                                             |                  | CD74 <sup>low</sup> | CD74 <sup>high</sup> | Statistics                              |                        |
|---------------------------------------------------------------------------------------------|------------------|---------------------|----------------------|-----------------------------------------|------------------------|
| Distribution<br>n (%)                                                                       | MHH <sup>f</sup> | 56 (82%)            | 12 (18%)             | <i>P</i> = 0.002<br>(MHH versus<br>UMG) | Fisher's exact<br>test |
|                                                                                             | UMG              | 60 (60%)            | 40 (40%)             |                                         |                        |
|                                                                                             | MHH+UMG          | 116 (69%)           | 52 (31%)             |                                         |                        |
| Age [years] <sup>a</sup><br>median ± SD<br>(range)                                          | MHH              | 60 ± 13 (35-85)     | 56 ± 12.5 (32-69)    | <i>P</i> = 0.357                        | Mann-Whitney<br>test   |
|                                                                                             | UMG              | 63 ± 11.5 (32-80)   | 64 ± 11.5 (25-18)    | <i>P</i> = 0.427                        |                        |
| Sex<br>female /male<br>(ratio)                                                              | MHH              | 27 / 29 (1 : 1.07)  | 3 / 9 (1 : 3)        | <i>P</i> = 0.204                        | Fisher's exact<br>test |
|                                                                                             | UMG              | 23 / 37 (1 : 1.61)  | 20 / 20 (1 : 1)      | <i>P</i> = 0.304                        |                        |
| Gross total<br>resection<br>n (%) <sup>c</sup>                                              | MHH              | 29 (52%)            | 7 (58%)              | <i>P</i> = 0.761                        | Fisher's exact<br>test |
|                                                                                             | UMG              | 44 (73%)            | 31 (78%)             | <i>P</i> = 0.814                        |                        |
| Chemotherapy <sup>b</sup><br>n (%) <sup>c</sup>                                             | MHH              | 37 (66%)            | 8 (67%)              | <i>P</i> > 0.999                        | Fisher's exact<br>test |
|                                                                                             | UMG              | 60 (100%)           | 40 (100%)            | <i>P</i> > 0.999                        |                        |
| <i>MGMT</i> promotor<br>methylated <sup>d</sup><br>n (%) <sup>c</sup>                       | UMG              | 20 (33%)            | 15 (38%)             | <i>P</i> = 0.675                        | Fisher's exact<br>test |
| <i>SIGLEC16</i> <sup>+P</sup><br>cases<br>n (%) <sup>c</sup>                                | MHH              | 17 (30%)            | 7 (58%)              | <i>P</i> = 0.096                        | Fisher's exact<br>test |
|                                                                                             | UMG              | 27 (45%)            | 22 (55%)             | <i>P</i> = 0.41                         |                        |
|                                                                                             | MHH+UMG          | 44 (38%)            | 29 (56%)             | <b><i>P</i> = 0.042<sup>e</sup></b>     |                        |
| <i>SIGLEC16</i> <sup>+P</sup> with<br>polySia-positive<br>tumor cells<br>n (%) <sup>c</sup> | MHH              | 15 (27%)            | 6 (50%)              | <i>P</i> = 0.168                        | Fisher's exact<br>test |
|                                                                                             | UMG              | 24 (40%)            | 19 (47%)             | <i>P</i> = 0.54                         |                        |
|                                                                                             | MHH+UMG          | 39 (34)             | 25 (48%)             | <b><i>P</i> = 0.028</b>                 |                        |

<sup>a</sup> Age at primary resection

<sup>b</sup> MHH: temozolomide, UMG: temozolomide, nimustine, or carmustine

<sup>c</sup> % of all CD74<sup>low</sup> or CD74<sup>high</sup>, respectively

<sup>d</sup> For MHH cohort not determined

<sup>e</sup> *P*-values < 0.05 are shown in bold

<sup>f</sup> For two specimen of the MHH cohort, the available FFPE tissue did not suffice for CD74/IBA1 immunostaining

**Supplementary Table S11.** Median age at resection of GB cases stratified for CD163 to CD68 (A) or CD74 to IBA1 ratios (B) alone or in combination with the *SIGLEC16* genotype

| <b>A. CD163</b>             |                             | Median age [years] <sup>a</sup> ± SD (range), n |                                            |  |
|-----------------------------|-----------------------------|-------------------------------------------------|--------------------------------------------|--|
|                             | <b>CD163<sup>high</sup></b> | <b>CD163<sup>low</sup></b>                      | <b>Mann-Whitney test</b>                   |  |
| MHH                         | 59.0 ± 13.3 (32-85), 42     | 60.0 ± 11.6 (35-76), 28                         | <i>P</i> = 0.72                            |  |
| UMG                         | 65.0 ± 10.5 (35-79), 70     | 66.5 ± 13.8 (25-80), 30                         | <i>P</i> = 0.51                            |  |
| MHH+UMG                     | 63.0 ± 11.7 (32-85), 112    | 64.0 ± 12.9 (25-88), 58                         | <i>P</i> = 0.92                            |  |
|                             |                             | Median age [years] <sup>a</sup> ± SD (range), n |                                            |  |
|                             |                             | <b><i>SIGLEC16</i><sup>P/P</sup></b>            | <b><i>SIGLEC16</i><sup>+/P</sup></b>       |  |
| <b>CD163<sup>high</sup></b> | MHH                         | 58.0 ± 12.8 (40-80), 32                         | 65.0 ± 15.1 (32-85), 10                    |  |
|                             | UMG                         | 66.0 ± 10.0 (37-79), 41                         | 64.0 ± 11.2 (35-78), 29                    |  |
|                             | MHH+UMG                     | 62.0 ± 11.5 (37-80), 73                         | 64.0 ± 12.1 (32-85), 39                    |  |
| <b>CD163<sup>low</sup></b>  | MHH                         | 60.0 ± 11.9 (35-74), 13                         | 60.0 ± 11.8 (43-76), 15                    |  |
|                             | UMG                         | 72.0 ± 11.0 (49-80), 10                         | 66.5 ± 14.9 (25-78), 20                    |  |
|                             | MHH+UMG                     | 63.0 ± 12.1 (35-80), 23                         | 64.0 ± 13.4 (25-78), 35                    |  |
| <b>Statistics</b>           |                             | <b>Kruskal-Wallis test</b>                      | <b>Dunn's post test</b>                    |  |
|                             | MHH                         | <i>P</i> = 0.76                                 | <i>P</i> > 0.999 for all group comparisons |  |
|                             | UMG                         | <i>P</i> = 0.63                                 |                                            |  |
|                             | MHH+UMG                     | <i>P</i> = 0.92                                 |                                            |  |

  

| <b>B. CD74</b>             |                           | Median age [years] <sup>a</sup> ± SD (range), n <sup>b</sup> |                                           |  |
|----------------------------|---------------------------|--------------------------------------------------------------|-------------------------------------------|--|
|                            | <b>CD74<sup>low</sup></b> | <b>CD74<sup>high</sup></b>                                   | <b>Mann-Whitney test</b>                  |  |
| MHH                        | 59.8 ± 12.6 (35-85), 56   | 56.3 ± 12.5 (32-69), 12                                      | <i>P</i> = 0.36                           |  |
| UMG                        | 62.7 ± 11.5 (32-80), 60   | 64.3 ± 11.5 (25-18), 40                                      | <i>P</i> = 0.43                           |  |
| MHH+UMG                    | 61.3 ± 12.1 (32-85), 116  | 62.4 ± 12.1 (25-78), 52                                      | <i>P</i> = 0.44                           |  |
|                            |                           | Median age [years] <sup>a</sup> ± SD (range), n              |                                           |  |
|                            |                           | <b><i>SIGLEC16</i><sup>P/P</sup></b>                         | <b><i>SIGLEC16</i><sup>+/P</sup></b>      |  |
| <b>CD74<sup>low</sup></b>  | MHH                       | 59.1 ± 12.6 (35-80), 39                                      | 61.7 ± 12.7 (43-85), 17                   |  |
|                            | UMG                       | 63.9 ± 10.5 (37-80), 33                                      | 61.2 ± 12.7 (32-78), 27                   |  |
|                            | MHH+UMG                   | 61.3 ± 11.9 (35-80), 72                                      | 61.4 ± 12.6 (32-85), 44                   |  |
| <b>CD74<sup>high</sup></b> | MHH                       | 55.8 ± 12.3 (43-69), 5                                       | 56.6 ± 13.7 (32-69), 7                    |  |
|                            | UMG                       | 66.6 ± 9.4 (45-77), 18                                       | 62.4 ± 12.9 (25-78), 22                   |  |
|                            | MHH+UMG                   | 64.3 ± 10.8 (43-77), 23                                      | 61.0 ± 12.6 (32-85), 29                   |  |
| <b>Statistics</b>          |                           | <b>Kruskal-Wallis test</b>                                   | <b>Dunn's post test</b>                   |  |
|                            | MHH                       | <i>P</i> = 0.67                                              | <i>P</i> > 0.90 for all group comparisons |  |
|                            | UMG                       | <i>P</i> = 0.54                                              |                                           |  |
|                            | MHH+UMG                   | <i>P</i> = 0.92                                              |                                           |  |

<sup>a</sup> Age at primary resection

<sup>b</sup> For two specimen of the MHH cohort, the available FFPE tissue did not suffice for CD74/IBA1 immunostaining

**Supplementary Table S12.** OS analysis of GB cases receiving (A) or not receiving gross total resection (B) stratified for CD163 to CD68 or CD74 to IBA1 ratios alone or in combination with the *SIGLEC16* genotype (MHH and UMG cohorts combined)

**A. Gross total resection (n=112)**

| GB status                                            | n               | median OS [months] | statistics (log-rank test)                                                                                     |
|------------------------------------------------------|-----------------|--------------------|----------------------------------------------------------------------------------------------------------------|
| CD163 <sup>high</sup>                                | 74              | 12                 | $P = 0.001$                                                                                                    |
| CD163 <sup>low</sup>                                 | 38              | 15                 |                                                                                                                |
| CD163 <sup>high</sup> <i>SIGLEC16</i> <sup>P/P</sup> | 43              | 8                  | $P = 0.0001$<br>$P = 0.005^a$<br>$q = 0.010$<br>$P < 0.0001$<br>$q < 0.0004$                                   |
| CD163 <sup>high</sup> <i>SIGLEC16</i> <sup>+P</sup>  | 30              | 14                 |                                                                                                                |
| CD163 <sup>low</sup> <i>SIGLEC16</i> <sup>P/P</sup>  | 14              | 12                 |                                                                                                                |
| CD163 <sup>low</sup> <i>SIGLEC16</i> <sup>+P</sup>   | 25              | 16                 |                                                                                                                |
| CD74 <sup>low</sup>                                  | 73 <sup>b</sup> | 12                 | $P = 0.006$                                                                                                    |
| CD74 <sup>high</sup>                                 | 38              | 15.5               |                                                                                                                |
| CD74 <sup>low</sup> <i>SIGLEC16</i> <sup>P/P</sup>   | 43              | 9                  | $P = 0.0003$<br>$P < 0.0001^a$<br>$q < 0.0003$<br>$P = 0.0088$<br>$q = 0.0092$<br>$P = 0.0007$<br>$q = 0.0011$ |
| CD74 <sup>low</sup> <i>SIGLEC16</i> <sup>+P</sup>    | 30              | 13                 |                                                                                                                |
| CD74 <sup>high</sup> <i>SIGLEC16</i> <sup>P/P</sup>  | 14              | 9.5                |                                                                                                                |
| CD74 <sup>high</sup> <i>SIGLEC16</i> <sup>+P</sup>   | 24              | 17.5               |                                                                                                                |

**B. Subtotal resection or biopsy (n=58)<sup>a</sup>**

| GB status                                            | n               | median OS [months] | statistics (log-rank test) |
|------------------------------------------------------|-----------------|--------------------|----------------------------|
| CD163 <sup>high</sup>                                | 37 <sup>a</sup> | 10                 | $P = 0.53$                 |
| CD163 <sup>low</sup>                                 | 20              | 10.5               |                            |
| CD163 <sup>high</sup> <i>SIGLEC16</i> <sup>P/P</sup> | 29 <sup>c</sup> | 11                 | $P = 0.55$                 |
| CD163 <sup>high</sup> <i>SIGLEC16</i> <sup>+P</sup>  | 9               | 10                 |                            |
| CD163 <sup>low</sup> <i>SIGLEC16</i> <sup>P/P</sup>  | 9               | 7                  |                            |
| CD163 <sup>low</sup> <i>SIGLEC16</i> <sup>+P</sup>   | 10              | 13                 |                            |
| CD74 <sup>low</sup>                                  | 42 <sup>c</sup> | 10                 | $P = 0.26$                 |
| CD74 <sup>high</sup>                                 | 14              | 12                 |                            |
| CD74 <sup>low</sup> <i>SIGLEC16</i> <sup>P/P</sup>   | 28 <sup>c</sup> | 9.5                | $P = 0.37$                 |
| CD74 <sup>low</sup> <i>SIGLEC16</i> <sup>+P</sup>    | 14              | 10                 |                            |
| CD74 <sup>high</sup> <i>SIGLEC16</i> <sup>P/P</sup>  | 9               | 12                 |                            |
| CD74 <sup>high</sup> <i>SIGLEC16</i> <sup>+P</sup>   | 5               | 10                 |                            |

<sup>a</sup> Differences with  $P < 0.05$  and respective FDR adjusted  $q$  values are shown

<sup>b</sup> For two specimen of the MHH cohort, the available FFPE tissue did not suffice for CD74/IBA1 immunostaining.

<sup>c</sup> One value censored because OS was zero

**Supplementary Table S13.** OS analysis of GB cases receiving (A) or not receiving chemotherapy (B) stratified for CD163 to CD68 or CD74 to IBA1 ratios alone or in combination with the *SIGLEC16* genotype (MHH cohort only)

**A.** Combined radio- and chemotherapy (n=45)

| GB status                                            | n  | median OS [months] | statistics (log-rank test) |
|------------------------------------------------------|----|--------------------|----------------------------|
| CD163 <sup>high</sup>                                | 23 | 10                 | $P = 0.009$                |
| CD163 <sup>low</sup>                                 | 22 | 15                 |                            |
| CD163 <sup>high</sup> <i>SIGLEC16</i> <sup>P/P</sup> | 19 | 10                 | $P = 0.020$                |
| CD163 <sup>high</sup> <i>SIGLEC16</i> <sup>+/P</sup> | 4  | 10                 |                            |
| CD163 <sup>low</sup> <i>SIGLEC16</i> <sup>P/P</sup>  | 9  | 12                 |                            |
| CD163 <sup>low</sup> <i>SIGLEC16</i> <sup>+/P</sup>  | 13 | 17                 |                            |
| CD74 <sup>low</sup>                                  | 37 | 12                 | $P = 0.036$                |
| CD74 <sup>high</sup>                                 | 8  | 14.5               |                            |
| CD74 <sup>low</sup> <i>SIGLEC16</i> <sup>P/P</sup>   | 24 | 11                 | $P = 0.002$                |
| CD74 <sup>low</sup> <i>SIGLEC16</i> <sup>+/P</sup>   | 13 | 14                 |                            |
| CD74 <sup>high</sup> <i>SIGLEC16</i> <sup>P/P</sup>  | 4  | 10.5               |                            |
| CD74 <sup>high</sup> <i>SIGLEC16</i> <sup>+/P</sup>  | 4  | 51                 |                            |

<sup>a</sup> Differences with  $P < 0.05$  and respective FDR adjusted  $q$  values are shown

**B.** Radiotherapy or no adjuvant therapy (n=25)<sup>a</sup>

| GB status                                            | n                  | median OS [months] | statistics (log-rank test) |
|------------------------------------------------------|--------------------|--------------------|----------------------------|
| CD163 <sup>high</sup>                                | 18 <sup>a</sup>    | 4                  | $P = 0.33$                 |
| CD163 <sup>low</sup>                                 | 6                  | 4.5                |                            |
| CD163 <sup>high</sup> <i>SIGLEC16</i> <sup>P/P</sup> | 12 <sup>a</sup>    | 4                  | $P = 0.19$                 |
| CD163 <sup>high</sup> <i>SIGLEC16</i> <sup>+/P</sup> | 6                  | 9                  |                            |
| CD163 <sup>low</sup> <i>SIGLEC16</i> <sup>P/P</sup>  | 4                  | 4.5                |                            |
| CD163 <sup>low</sup> <i>SIGLEC16</i> <sup>+/P</sup>  | 2                  | 5                  |                            |
| CD74 <sup>low</sup>                                  | 18 <sup>a, b</sup> | 4                  | $P = 0.71$                 |
| CD74 <sup>high</sup>                                 | 4                  | 3.5                |                            |
| CD74 <sup>low</sup> <i>SIGLEC16</i> <sup>P/P</sup>   | 14 <sup>a</sup>    | 4                  | $P = 0.12$                 |
| CD74 <sup>low</sup> <i>SIGLEC16</i> <sup>+/P</sup>   | 4                  | 9                  |                            |
| CD74 <sup>high</sup> <i>SIGLEC16</i> <sup>P/P</sup>  | 1                  | 3                  |                            |
| CD74 <sup>high</sup> <i>SIGLEC16</i> <sup>+/P</sup>  | 3                  | 4                  |                            |

<sup>a</sup> One value censored because OS was zero

<sup>b</sup> For two specimen of the MHH cohort, the available FFPE tissue did not suffice for CD74/IBA1 immunostaining

**Supplementary Table S14.**

OS analysis of GB cases receiving both gross total resection and chemotherapy stratified for CD163 to CD68 or CD74 to IBA1 ratios alone or in combination with the *SIGLEC16* genotype (MHH and UMG cohorts combined, n=101)

| GB status                                            | n  | median OS [months] | statistics (log-rank test)                                                                                                                                                 |
|------------------------------------------------------|----|--------------------|----------------------------------------------------------------------------------------------------------------------------------------------------------------------------|
| CD163 <sup>high</sup>                                | 65 | 13                 | $P = 0.002$                                                                                                                                                                |
| CD163 <sup>low</sup>                                 | 36 | 15                 |                                                                                                                                                                            |
| CD163 <sup>high</sup> <i>SIGLEC16</i> <sup>P/P</sup> | 36 | 11                 | $P = 0.0008$ <span style="font-size: 2em; vertical-align: middle;">}</span> $P = 0.0002^a$<br>$q = 0.001$                                                                  |
| CD163 <sup>high</sup> <i>SIGLEC16</i> <sup>+P</sup>  | 28 | 14                 |                                                                                                                                                                            |
| CD163 <sup>low</sup> <i>SIGLEC16</i> <sup>P/P</sup>  | 13 | 13                 |                                                                                                                                                                            |
| CD163 <sup>low</sup> <i>SIGLEC16</i> <sup>+P</sup>   | 24 | 17                 |                                                                                                                                                                            |
| CD74 <sup>low</sup>                                  | 65 | 12                 | $P = 0.009$                                                                                                                                                                |
| CD74 <sup>high</sup>                                 | 36 | 16                 |                                                                                                                                                                            |
| CD74 <sup>low</sup> <i>SIGLEC16</i> <sup>P/P</sup>   | 36 | 11.5               | $P = 0.0009$ <span style="font-size: 2em; vertical-align: middle;">}</span> $P = 0.0002^a$<br>$q = 0.0006$<br>$P = 0.0013$<br>$q = 0.0020$<br>$P = 0.0061$<br>$q = 0.0064$ |
| CD74 <sup>low</sup> <i>SIGLEC16</i> <sup>+P</sup>    | 29 | 13                 |                                                                                                                                                                            |
| CD74 <sup>high</sup> <i>SIGLEC16</i> <sup>P/P</sup>  | 13 | 11                 |                                                                                                                                                                            |
| CD74 <sup>high</sup> <i>SIGLEC16</i> <sup>+P</sup>   | 23 | 18                 |                                                                                                                                                                            |

<sup>a</sup> Differences with  $P < 0.05$  and respective FDR adjusted  $q$  values are shown
