# Supplementary material
Source: PubMed Central journal article supplement (PMC10330235)
Supplement: NIHMS1894456-supplement-3.pdf [file NIHMS1894456-supplement-3.pdf]

## Thiesler et al. Supplementary Figure S1

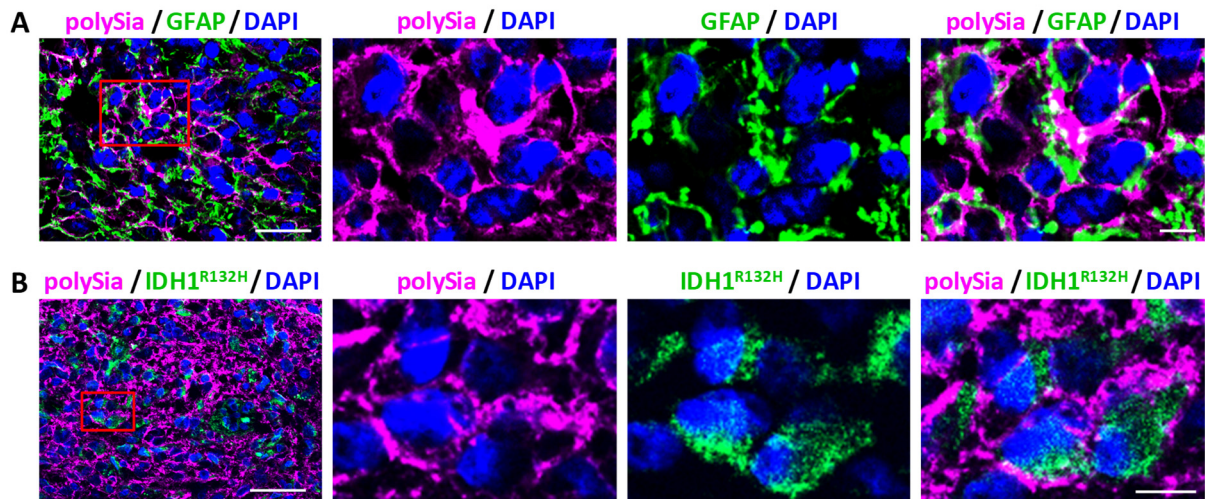

**Supplementary Figure S1.** PolySia is associated with GFAP-positive cells in an IDH-wildtype GB (A) and with IDH1<sup>R132H</sup>-positive cells in a GB specimen with the respective *IDH1* mutation (B). Immunofluorescence staining of polySia (magenta) and GFAP in A or IDH1<sup>R132H</sup> in B, (green), as indicated. Nuclei were counterstained with DAPI (blue). Higher magnification views correspond to areas boxed in the overview images. Scale bars, 50 μm (overviews), 10 μm (higher magnification views).
