# Supplementary material
Source: PubMed Central journal article supplement (PMC10330235)
Supplement: NIHMS1894456-supplement-5.pdf [file NIHMS1894456-supplement-5.pdf]

### Thiesler et al. Supplementary Figure S3

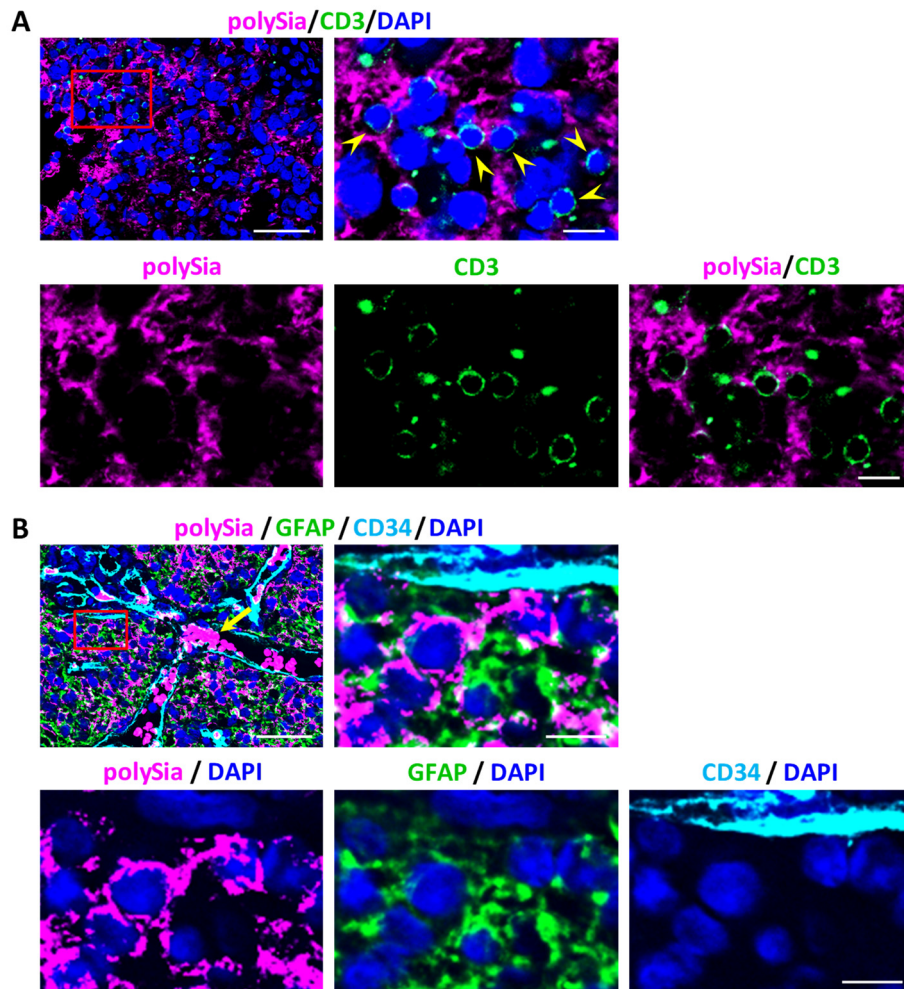

**Supplementary Figure S3.** PolySia is not associated with CD3-positive T cells (**A**, arrowheads) or CD34-positive endothelial cells (**B**). Immunofluorescence staining of polySia (magenta), CD3 in **A** or GFAP in **B** (green), and CD34 in **B** (cyan), as indicated. Nuclei were counterstained with DAPI (blue). Higher magnification views correspond to areas boxed in the overview images. Arrow in **B** indicates autofluorescent erythrocytes. Scale bars, 50  $\mu\text{m}$  (overviews), 10  $\mu\text{m}$  (higher magnification views).
