# Supplementary material
Source: PubMed Central journal article supplement (PMC10330235)
Supplement: NIHMS1894456-supplement-6.pdf [file NIHMS1894456-supplement-6.pdf]

## Thiesler et al. Supplementary Figure S4

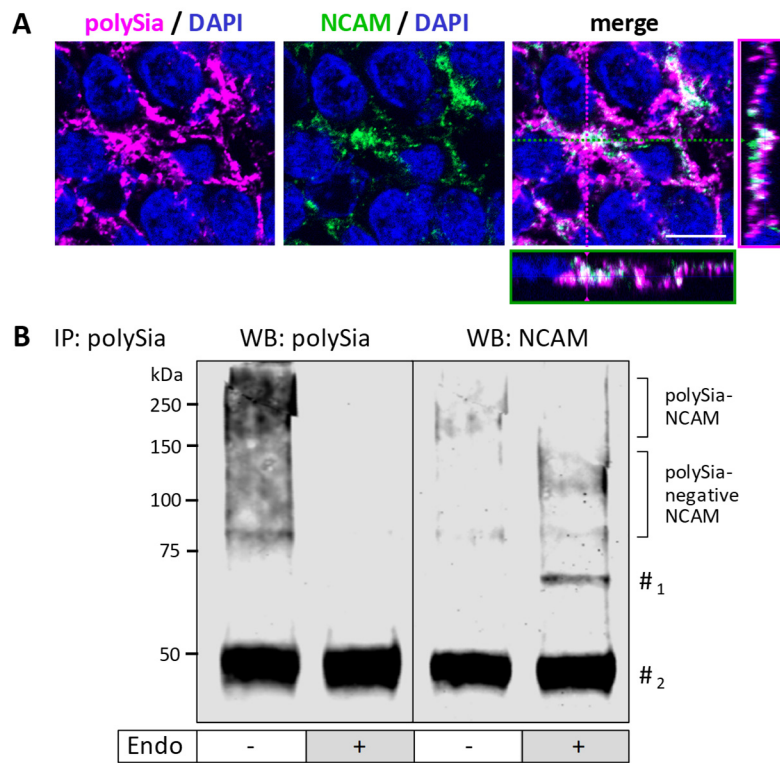

**Supplementary Figure S4.** PolySia on GB tumor cells is associated with NCAM. **A**, Double staining of polySia (magenta) and NCAM (green) with 3D reconstruction for colocalization analysis. Nuclei were counterstained with DAPI (blue). Scale bar, 10  $\mu$ m. **B**, Immunoprecipitation (IP) of polysialylated proteins from polySia-positive GB tissue lysate using polySia-specific mAb 735-conjugated magnetic beads followed by Western blot (WB) detection with polySia-specific antibody (left), and, after stripping, with mAb 123C3, specific for the extracellular part of NCAM (right). Where indicated, IP fractions were treated with endosialidase (Endo +), to remove polysialic acid. Despite the reduced access of mAb 123C3 to polysialylated NCAM (1), the high molecular weight smear obtained with polySia-specific antibody was partially detected by mAb 123C3. The shift of the signal towards a smaller apparent molecular weight denotes the loss of polySia-NCAM and the appearance of polySia-negative NCAM, as indicated. #<sub>1</sub> designates a band appearing after endosialidase treatment that migrates at the apparent molecular weight of the endosialidase monomers (2) and cross-reacts with the IgG1- but not the IgG2a-specific secondary antibodies applied for the detection of NCAM and polySia, respectively. #<sub>2</sub> designates a signal caused by the heavy chain of the antibody used for IP.

### References

- Hildebrandt H, Becker C, Glüer S, Rösner H, Gerardy-Schahn R, Rahmann H. Polysialic acid on the neural cell adhesion molecule correlates with expression of polysialyltransferases and promotes neuroblastoma cell growth. *Cancer Res* 1998;58:779-84
- Stummeyer K, Dickmanns A, Mühlhoff M, Gerardy-Schahn R, Ficner R. Crystal structure of the polysialic acid-degrading endosialidase of bacteriophage K1F. *Nat Struct Mol Biol* 2005;12:90-6
